# Supplementary material for: Graphene oxide modified metallic lithium electrode and its electrochemical performances in lithium–sulfur full batteries and symmetric lithium–metal coin cells
Source: Royal Society of Chemistry journal article supplement (doi:10.1039/c6ra13039a), 2016-01-01
Supplement: c6ra13039a1.pdf [file c6ra13039a1.pdf]

## Supporting Information

### **Graphene oxide modified metallic lithium electrode and its electrochemical performances in lithium-sulfur full batteries and symmetric lithium-metal coin cells**

Yi-jun Zhang, Xin-hui Xia, Xiu-li Wang, Chang-dong Gu, and Jiang-ping Tu\*

*State Key Laboratory of Silicon Materials, Key Laboratory of Advanced Materials and  
Applications for Batteries of Zhejiang Province, and School of Materials Science and Engineering,  
Zhejiang University, Hangzhou 310027, China*

\*Corresponding author: Tel.: +86-571-87952856; Fax: +86-571-87952573.

*E-mail address:* [tujp@zju.edu.cn](mailto:tujp@zju.edu.cn); [tujplab@zju.edu.cn](mailto:tujplab@zju.edu.cn) (J.P. Tu)

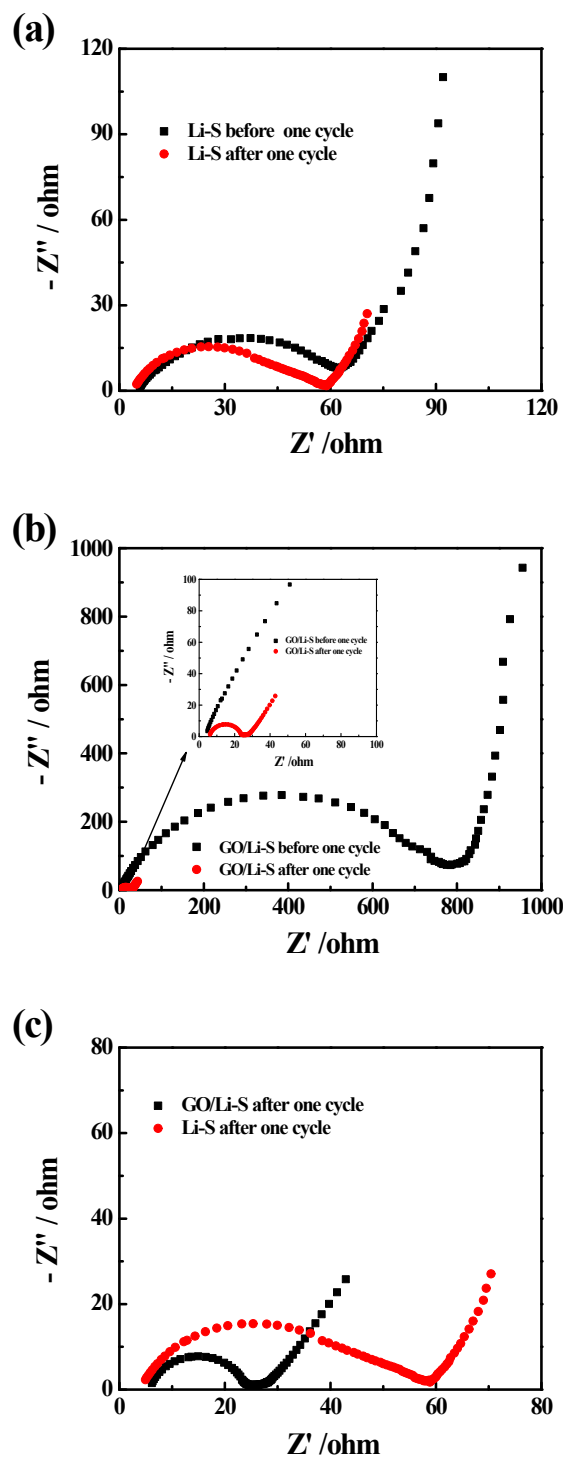

**Figure S1.** EIS plots: (a) Li-S battery and (b) GO/Li-S battery before and after the first cycle, (c) Li-S and GO/Li-S batteries after the first cycle.
